# Supplementary material for: ErbB-3 activation by NRG-1β sustains growth and promotes vemurafenib resistance in BRAF-V600E colon cancer stem cells (CSCs)
Source: PubMed Central journal article supplement (PMC4627280; doi:10.18632/oncotarget.4642), 2015-06-25
Supplement: oncotarget-06-16902-s001.pdf [file oncotarget-06-16902-s001.pdf]

# ErbB-3 activation by NRG-1 $\beta$ sustains growth and promotes vemurafenib resistance in BRAF-V600E colon cancer stem cells (CSCs)

## Supplementary Material

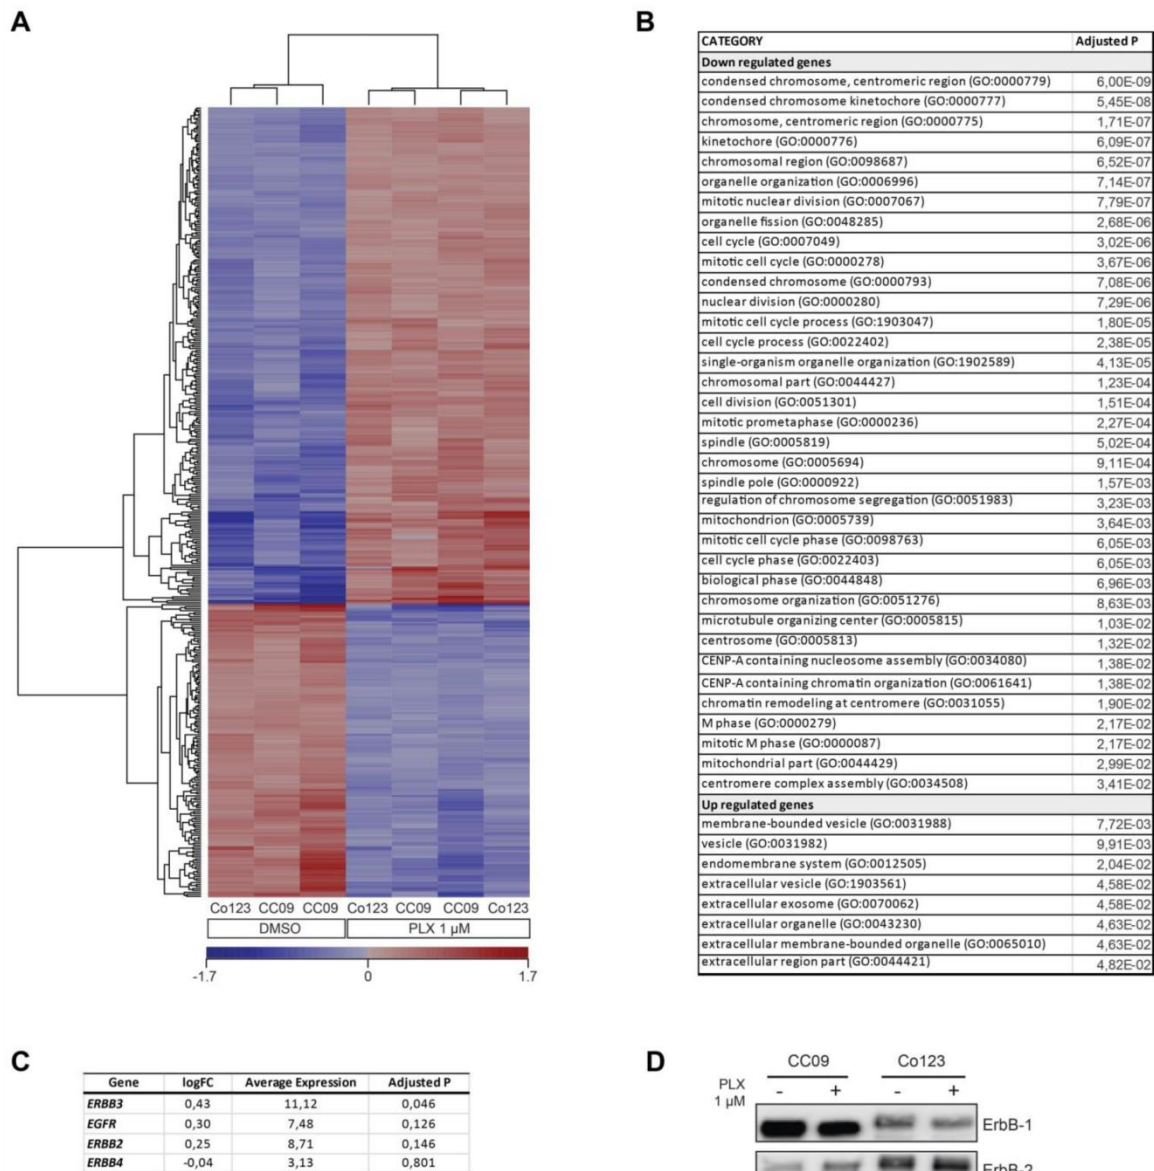

### Supplementary Fig. S1.

(A) Heatmap depicting differential gene expression in DMSO and 1  $\mu$ M Vemurafenib treated BRAF mutant cells using Affymetrix U133 array ( $p < 0.05$ ). Up-regulated genes depicted in red, down-regulated genes depicted in blue (see color bar). (B) Gene Ontology (GO) analysis of the differentially expressed genes in A revealed a number of gene clusters that are associated with the response to Vemurafenib. (C) Microarray data analysis on ErbB-family receptor gene expression showed the significant upregulation of ErbB-3 after Vemurafenib exposure. LogFC indicates the change in expression upon Vemurafenib treatment compared to DMSO (log<sub>2</sub> ratio), average expression is the mean log<sub>2</sub> intensity from all measurements (D) Immunoblot analysis of total ErbB-1, ErbB-2 and ErbB-3 in BRAF mutant cells treated with 1  $\mu$ M Vemurafenib for 48 hours. Total Erk1/2 was used as loading control.

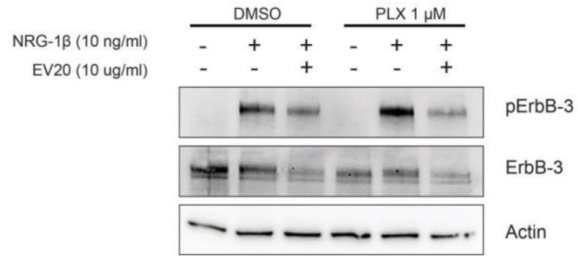

**Supplementary Figure S2.**

Immunoblot analysis of ErbB-3 phosphorylation of Co123 cells treated overnight with Vemurafenib (1 $\mu$ M) and then stimulated for 5 minutes with NRG-1 $\beta$  (10ng/ml) in presence or absence of EV20 (10  $\mu$ g/ml).
